# Supplementary material for: Cold-Stress Response of Probiotic Lactobacillus plantarum K25 by iTRAQ Proteomic Analysis
Source: PubMed Central journal article supplement (PMC9728241; doi:10.4014/jmb.1909.09021), 2019-11-22
Supplement: JMB-30-2-187-supple.pdf [file JMB-30-2-187-supple.pdf]

|   | Protein-ID               | Gene name | Primer                                           | Fold-change |
|---|--------------------------|-----------|--------------------------------------------------|-------------|
| 1 | Lb.plantarum_K25GM000048 | Csp       | CCGGTTCGGATAATAAAGATG<br>CAACATTCGTTGCTTGAGGG    | 2.9205      |
| 2 | Lb.plantarum_K25GM000450 | cshA      | CAAGTCGTTTACGGTGGTGC<br>GCATAGTTTGGCGTTCATCC     | 2.2695      |
| 3 | Lb.plantarum_K25GM000090 | hsp31     | TAGTCCTAATGGTGGCTTCG<br>GCTTGTAACTCAGGGTTGTCC    | 2.093       |
| 4 | Lb.plantarum_K25GM002020 | mreB      | AGGTGGAATCGTATCAAGTCG<br>AGTTGTTTCGGCTGTGCGTT    | 1.5795      |
| 5 | Lb.plantarum_K25GM001702 | dnaK      | TATTCATTCGCTCTACAACAAGC<br>ACGCTCACGGTCATCCACTA  | 0.51        |
| 6 | Lb.plantarum_K25GM001395 | fabD      | CCCCAAAGCGGTAAGGTTG<br>GCAATACCAAATACTTAGCACC    | 0.529       |
| 7 | Lb.plantarum_K25GM000638 | groES     | TCTGCGGGTAACTGCTGATT<br>CATACTCGCCAAGGCTCAAT     | 0.4205      |
| 8 | Lb.plantarum_K25GM002797 | fruB      | AAGTGGACTGGCAAAGAATCTA<br>TACCAAGTGAAAGTGGCGTAAC | 0.4105      |

Table S1. Primer sequences used for qRT-PCR.

| Carbohydrate transport and metabolism |                                                                   |       |
|---------------------------------------|-------------------------------------------------------------------|-------|
| Protein-ID                            | NCBIr Description                                                 | Ratio |
| Lb.plantarum_K25GM000728              | Galactose mutarotase                                              | 2.091 |
| Lb.plantarum_K25GM001558              | Luciferase                                                        | 1.959 |
| Lb.plantarum_K25GM000114              | Alcohol dehydrogenase                                             | 1.873 |
| Lb.plantarum_K25GM000799              | Fructose-2,6-bisphosphatase                                       | 1.762 |
| Lb.plantarum_K25GM001028              | Glycerol uptake facilitator protein                               | 1.567 |
| Lb.plantarum_K25GM001351              | Ribulose-phosphate 3-epimerase                                    | 1.542 |
| Lb.plantarum_K25GM001494              | Phosphoglycerate mutase                                           | 0.644 |
| Lb.plantarum_K25GM000738              | Glycerol kinase                                                   | 0.629 |
| Lb.plantarum_K25GM000469              | Lactate dehydrogenase, partial                                    | 0.61  |
| Lb.plantarum_K25GM000964              | Citrate lyase subunit alpha                                       | 0.608 |
| Lb.plantarum_K25GM002987              | Galactokinase                                                     | 0.579 |
| Lb.plantarum_K25GM000974              | Class II fumarate hydratase                                       | 0.575 |
| Lb.plantarum_K25GM000391              | PTS cellobiose transporter subunit IIC                            | 0.538 |
| Lb.plantarum_K25GM001872              | 2-oxo acid dehydrogenase acyltransferase                          | 0.513 |
| Lb.plantarum_K25GM000506              | PTS mannose transporter subunit IID                               | 0.511 |
| Lb.plantarum_K25GM002040              | PTS system sorbose subfamily IIB component                        | 0.51  |
| Lb.plantarum_K25GM001873              | 2-oxoisovalerate dehydrogenase subunit beta                       | 0.508 |
| Lb.plantarum_K25GM001874              | Pyruvate dehydrogenase (acetyl-transferring) E1 component subunit | 0.5   |

|                          |                                               |       |
|--------------------------|-----------------------------------------------|-------|
|                          | alpha                                         |       |
| Lb.plantarum_K25GM000182 | Maltose phosphorylase                         | 0.462 |
| Lb.plantarum_K25GM001444 | Maltose phosphorylase                         | 0.459 |
| Lb.plantarum_K25GM002352 | PTS cellobiose transporter subunit IIA        | 0.45  |
| Lb.plantarum_K25GM003043 | Xylulose-5-phosphate phosphoketolase          | 0.45  |
| Lb.plantarum_K25GM000227 | Mannitol-1-phosphate 5-dehydrogenase          | 0.447 |
| Lb.plantarum_K25GM000181 | Sugar ABC transporter ATP-binding protein     | 0.446 |
| Lb.plantarum_K25GM000185 | Fructokinase                                  | 0.446 |
| Lb.plantarum_K25GM000957 | L-lactate dehydrogenase                       | 0.421 |
| Lb.plantarum_K25GM000960 | Malate dehydrogenase                          | 0.407 |
| Lb.plantarum_K25GM002797 | PTS fructose/mannitol specific EIIA component | 0.338 |
| Lb.plantarum_K25GM000264 | PTS fructose transporter subunit IIC          | 0.315 |

| Energy production and conversion |                                                         |       |
|----------------------------------|---------------------------------------------------------|-------|
| Protein-ID                       | NCBI Inr Description                                    | Ratio |
| Lb.plantarum_K25GM000772         | Lactate dehydrogenase                                   | 2.935 |
| Lb.plantarum_K25GM001545         | Aldose 1-epimerase                                      | 2.554 |
| Lb.plantarum_K25GM000091         | NADPH:quinone reductase                                 | 2.177 |
| Lb.plantarum_K25GM000975         | Flavocytochrome c                                       | 0.615 |
| Lb.plantarum_K25GM001871         | Dihydrolipoyl dehydrogenase                             | 0.585 |
| Lb.plantarum_K25GM000710         | Phosphate acetyltransferase                             | 0.577 |
| Lb.plantarum_K25GM002535         | PTS N-acetylglucosamine transporter subunit IIABC       | 0.576 |
| Lb.plantarum_K25GM000180         | Alpha-amylase                                           | 0.567 |
| Lb.plantarum_K25GM002994         | Glyceraldehyde 3-phosphate reductase                    | 0.564 |
| Lb.plantarum_K25GM000961         | [citrate (pro-3S)-lyase] ligase                         | 0.551 |
| Lb.plantarum_K25GM000963         | Citrate (pro-3S)-lyase subunit beta                     | 0.541 |
| Lb.plantarum_K25GM002796         | Fructose-like phosphotransferase enzyme IIB component 2 | 0.53  |
| Lb.plantarum_K25GM000067         | Flavoprotein                                            | 0.527 |
| Lb.plantarum_K25GM000224         | PTS mannitol transporter subunit IICB                   | 0.526 |
| Lb.plantarum_K25GM000962         | Citrate lyase ACP                                       | 0.513 |
| Lb.plantarum_K25GM002350         | 6-phospho-beta-glucosidase                              | 0.484 |
| Lb.plantarum_K25GM003038         | Sorbitol dehydrogenase                                  | 0.481 |
| Lb.plantarum_K25GM002353         | PTS sugar transporter subunit IIB                       | 0.477 |
| Lb.plantarum_K25GM000504         | PTS mannose transporter subunit EIIAB                   | 0.468 |
| Lb.plantarum_K25GM000979         | NAD-dependent malic enzyme                              | 0.464 |
| Lb.plantarum_K25GM002865         | Formate acetyltransferase                               | 0.435 |
| Lb.plantarum_K25GM003040         | PTS galactitol transporter subunit IIB                  | 0.419 |
| Lb.plantarum_K25GM000975         | Lactate dehydrogenase                                   | 2.935 |

| Amino acid metabolism    |                        |       |
|--------------------------|------------------------|-------|
| Protein-ID               | NCBI Inr Description   | Ratio |
| Lb.plantarum_K25GM001326 | Xaa-Pro aminopeptidase | 3.975 |
| Lb.plantarum_K25GM000223 | Peptidase C69          | 1.936 |

|                          |                                             |       |
|--------------------------|---------------------------------------------|-------|
| Lb.plantarum_K25GM002172 | Histidinol dehydrogenase                    | 1.827 |
| Lb.plantarum_K25GM000312 | Peptidase C69                               | 1.758 |
| Lb.plantarum_K25GM000346 | ABC transporter ATP-binding protein         | 1.675 |
| Lb.plantarum_K25GM001432 | Diaminopimelate decarboxylase               | 1.503 |
| Lb.plantarum_K25GM001244 | Cysteine desulfurase                        | 0.613 |
| Lb.plantarum_K25GM002333 | Threonine synthase                          | 0.603 |
| Lb.plantarum_K25GM002230 | Cystathionine gamma-synthase                | 0.585 |
| Lb.plantarum_K25GM002349 | D-serine dehydratase                        | 0.563 |
| Lb.plantarum_K25GM002936 | Glutamate decarboxylase                     | 0.539 |
| Lb.plantarum_K25GM002840 | Methionine synthase II                      | 0.514 |
| Lb.plantarum_K25GM000706 | Peptide ABC transporter ATP-binding protein | 0.498 |
| Lb.plantarum_K25GM002285 | Carbamoyl-phosphate synthase small subunit  | 0.475 |
| Lb.plantarum_K25GM002284 | Carbamoyl phosphate synthase large subunit  | 0.448 |
| Lb.plantarum_K25GM000682 | Argininosuccinate synthase                  | 0.43  |

| Lipid transport and metabolism |                                                                |       |
|--------------------------------|----------------------------------------------------------------|-------|
| Protein-ID                     | NCBI Inr Description                                           | Ratio |
| Lb.plantarum_K25GM000756       | Acyltransferase                                                | 2.054 |
| Lb.plantarum_K25GM001818       | Short-chain dehydrogenase                                      | 1.848 |
| Lb.plantarum_K25GM001393       | 3-oxoacyl-ACP synthase III                                     | 0.582 |
| Lb.plantarum_K25GM001400       | Acetyl-CoA carboxylase                                         | 0.549 |
| Lb.plantarum_K25GM001397       | 3-oxoacyl-(acyl-carrier-protein) synthase II                   | 0.539 |
| Lb.plantarum_K25GM001403       | Enoyl-[acyl-carrier-protein] reductase                         | 0.51  |
| Lb.plantarum_K25GM001395       | ACP S-malonyltransferase                                       | 0.509 |
| Lb.plantarum_K25GM001396       | 3-oxoacyl-ACP reductase                                        | 0.507 |
| Lb.plantarum_K25GM001392       | Beta-hydroxyacyl-ACP dehydratase                               | 0.494 |
| Lb.plantarum_K25GM001402       | Acetyl-CoA carboxylase carboxyl transferase subunit alpha      | 0.491 |
| Lb.plantarum_K25GM001399       | Beta-hydroxyacyl-ACP dehydratase                               | 0.477 |
| Lb.plantarum_K25GM001401       | Acetyl-CoA carboxylase subunit beta                            | 0.476 |
| Lb.plantarum_K25GM001394       | Acyl carrier protein                                           | 0.46  |
| Lb.plantarum_K25GM001398       | Acetyl-CoA carboxylase biotin carboxyl carrier protein subunit | 0.349 |

| Cell wall/membrane/envelope biogenesis |                                                                   |       |
|----------------------------------------|-------------------------------------------------------------------|-------|
| Protein-ID                             | NCBI Inr Description                                              | Ratio |
| Lb.plantarum_K25GM001083               | D-alanyl-D-alanine carboxypeptidase                               | 3.075 |
| Lb.plantarum_K25GM001081               | Glycosyl transferase                                              | 2.333 |
| Lb.plantarum_K25GM002062               | UDP-N-acetylglucosamine 1-carboxyvinyltransferase                 | 2.095 |
| Lb.plantarum_K25GM000623               | UDP-glucose 4-epimerase GalE                                      | 1.758 |
| Lb.plantarum_K25GM002189               | Sulfatase alkaline phosphatase superfamily membrane-bound protein | 1.746 |
| Lb.plantarum_K25GM000449               | UDP-N-acetylmuramoyl-tripeptide--D-alanyl-D-alanine ligase        | 1.736 |
| Lb.plantarum_K25GM003205               | dTDP-4-dehydrothamnose 3,5-epimerase                              | 1.611 |
| Lb.plantarum_K25GM002986               | UDP-glucose 4-epimerase GalE                                      | 0.595 |

| Chaperone                |                                                     |       |
|--------------------------|-----------------------------------------------------|-------|
| Protein-ID               | NCBI Inr Description                                | Ratio |
| Lb.plantarum_K25GM000048 | Cold-shock protein A                                | 3.258 |
| Lb.plantarum_K25GM000090 | Heat shock protein Hsp31                            | 2.199 |
| Lb.plantarum_K25GM001014 | Cold-shock protein B                                | 2.131 |
| Lb.plantarum_K25GM000877 | Cold shock protein CspC                             | 2.108 |
| Lb.plantarum_K25GM001703 | Co-chaperone GrpE                                   | 0.652 |
| Lb.plantarum_K25GM001594 | ATP-dependent chaperone ClpB                        | 0.543 |
| Lb.plantarum_K25GM002894 | Heat-shock protein Hsp20                            | 0.519 |
| Lb.plantarum_K25GM003063 | ATP-dependent Clp protease ATP-binding subunit ClpL | 0.509 |
| Lb.plantarum_K25GM001702 | Molecular chaperone DnaK                            | 0.505 |
| Lb.plantarum_K25GM000639 | Molecular chaperone GroEL                           | 0.498 |
| Lb.plantarum_K25GM000638 | Co-chaperone GroES                                  | 0.428 |

| Transcription and Translation |                                                        |       |
|-------------------------------|--------------------------------------------------------|-------|
| Protein-ID                    | NCBI Inr Description                                   | Ratio |
| Lb.plantarum_K25GM001925      | Methyltransferases                                     | 1.958 |
| Lb.plantarum_K25GM002411      | Methylated-DNA--[protein]-cysteine S-methyltransferase | 3.591 |
| Lb.plantarum_K25GM001549      | tRNA (uracil-5-)-methyltransferase Gid                 | 2.977 |
| Lb.plantarum_K25GM001006      | 23S rRNA (uracil-5-)-methyltransferase RumA            | 2.759 |
| Lb.plantarum_K25GM000615      | Recombination protein RecR                             | 2.741 |
| Lb.plantarum_K25GM003341      | Anaerobic ribonucleoside triphosphate reductase        | 2.463 |
| Lb.plantarum_K25GM000678      | Excinuclease ABC subunit B                             | 2.432 |
| Lb.plantarum_K25GM002761      | Foldase                                                | 2.408 |
| Lb.plantarum_K25GM001547      | ATP-dependent protease subunit HslV                    | 2.329 |
| Lb.plantarum_K25GM000679      | UvrABC system protein A                                | 2.311 |
| Lb.plantarum_K25GM001269      | RNA-binding protein                                    | 2.158 |
| Lb.plantarum_K25GM001347      | 16S rRNA (cytosine(967)-C(5))-methyltransferase        | 2.1   |
| Lb.plantarum_K25GM001581      | Ribosomal large subunit pseudouridine synthase B       | 2.093 |
| Lb.plantarum_K25GM001716      | 50S ribosomal protein L7/L12                           | 2.02  |
| Lb.plantarum_K25GM002004      | DNA recombination/repair protein RecA                  | 1.992 |
| Lb.plantarum_K25GM001016      | ATP-dependent RNA helicase                             | 1.977 |
| Lb.plantarum_K25GM002261      | Ribonucleotide reductase assembly protein NrdI         | 1.923 |
| Lb.plantarum_K25GM001926      | 30S ribosomal protein S14                              | 1.92  |
| Lb.plantarum_K25GM001931      | RNA pseudouridine synthase                             | 1.897 |
| Lb.plantarum_K25GM001017      | Helicase                                               | 1.885 |
| Lb.plantarum_K25GM001546      | ATP-dependent protease ATPase subunit HslU             | 1.882 |
| Lb.plantarum_K25GM001228      | Foldase                                                | 1.881 |
| Lb.plantarum_K25GM002043      | Recombinase RarA                                       | 1.877 |
| Lb.plantarum_K25GM002278      | Helicase-exonuclease AddAB subunit AddA                | 1.817 |
| Lb.plantarum_K25GM003337      | Ribonucleotide-diphosphate reductase subunit alpha     | 1.799 |
| Lb.plantarum_K25GM001468      | RNA methyltransferase                                  | 1.798 |
| Lb.plantarum_K25GM002789      | RNA methyltransferase                                  | 1.788 |

|                          |                                                              |       |
|--------------------------|--------------------------------------------------------------|-------|
| Lb.plantarum_K25GM000896 | 30S ribosomal protein S12                                    | 1.781 |
| Lb.plantarum_K25GM001916 | 16S rRNA (cytosine(1402)-N(4))-methyltransferase             | 1.755 |
| Lb.plantarum_K25GM001234 | tRNA (guanine-N(7)-)-methyltransferase                       | 1.75  |
| Lb.plantarum_K25GM001257 | Translation initiation factor IF-3                           | 1.747 |
| Lb.plantarum_K25GM000004 | DNA topoisomerase IV subunit B                               | 1.743 |
| Lb.plantarum_K25GM001816 | Recombinase RecJ                                             | 1.728 |
| Lb.plantarum_K25GM001892 | tRNA (5-methylaminomethyl-2-thiouridylate)-methyltransferase | 1.714 |
| Lb.plantarum_K25GM001715 | Translation initiation factor IF-2                           | 1.683 |
| Lb.plantarum_K25GM001490 | Pseudouridine synthase                                       | 1.676 |
| Lb.plantarum_K25GM001720 | DNA polymerase III subunit alpha                             | 1.654 |
| Lb.plantarum_K25GM000701 | Ribonuclease R                                               | 1.651 |
| Lb.plantarum_K25GM000473 | Ribosome-associated heat shock protein                       | 1.647 |
| Lb.plantarum_K25GM001993 | Holliday junction DNA helicase RuvB                          | 1.641 |
| Lb.plantarum_K25GM001986 | ATP-dependent RNA helicase                                   | 1.623 |
| Lb.plantarum_K25GM001878 | Ribonuclease J                                               | 1.619 |
| Lb.plantarum_K25GM001117 | 16S rRNA pseudouridine(516) synthase                         | 1.59  |
| Lb.plantarum_K25GM001354 | 50S ribosomal protein L28                                    | 1.574 |
| Lb.plantarum_K25GM000003 | DNA recombination protein RecF                               | 1.555 |
| Lb.plantarum_K25GM000410 | Ribosomal RNA small subunit methyltransferase A              | 1.548 |
| Lb.plantarum_K25GM002279 | ATP-dependent helicase/deoxyribonuclease subunit B           | 1.536 |
| Lb.plantarum_K25GM001543 | DNA topoisomerase IV subunit B                               | 1.533 |
| Lb.plantarum_K25GM000531 | 23S rRNA (guanosine(2251)-2'-O)-methyltransferase RlmB       | 1.5   |
| Lb.plantarum_K25GM003348 | Adenosine deaminase                                          | 0.616 |
| Lb.plantarum_K25GM000233 | Nucleoside-diphosphate kinase                                | 0.574 |
| Lb.plantarum_K25GM003353 | DNA topoisomerase III                                        | 0.564 |
| Lb.plantarum_K25GM000845 | Asparagine--tRNA ligase                                      | 0.559 |
| Lb.plantarum_K25GM003247 | Topoisomerase I                                              | 0.508 |
| Lb.plantarum_K25GM000558 | DNA recombination protein RecT                               | 0.506 |
| Lb.plantarum_K25GM002283 | Dihydroorotate dehydrogenase                                 | 0.451 |

| Transcription Regulator  |                                         |       |
|--------------------------|-----------------------------------------|-------|
| Protein-ID               | NCBI Inr Description                    | Ratio |
| Lb.plantarum_K25GM002204 | Transcriptional regulator, RpiR family  | 1.871 |
| Lb.plantarum_K25GM002319 | GntR family transcriptional regulator   | 2.862 |
| Lb.plantarum_K25GM000755 | Bifunctional protein BirA               | 2.385 |
| Lb.plantarum_K25GM000304 | GntR family transcriptional regulator   | 1.777 |
| Lb.plantarum_K25GM002638 | TetR family transcriptional regulator   | 1.651 |
| Lb.plantarum_K25GM001469 | transcriptional regulator               | 3.258 |
| Lb.plantarum_K25GM001322 | TetR family transcriptional regulator   | 3.071 |
| Lb.plantarum_K25GM001822 | Transcriptional regulator, DeoR family  | 1.708 |
| Lb.plantarum_K25GM000977 | LysR family transcriptional regulator   | 2.108 |
| Lb.plantarum_K25GM002251 | GntR family transcriptional regulator   | 2.38  |
| Lb.plantarum_K25GM002976 | HTH-type transcriptional regulator GanR | 2.131 |

|                          |                                                         |       |
|--------------------------|---------------------------------------------------------|-------|
| Lb.plantarum_K25GM003058 | ArsR family transcriptional regulator                   | 1.716 |
| Lb.plantarum_K25GM001616 | HTH-type transcriptional repressor GlcR                 | 0.611 |
| Lb.plantarum_K25GM001030 | Uncharacterized HTH-type transcriptional regulator YobD | 0.599 |
| Lb.plantarum_K25GM000243 | Trehalose operon repressor                              | 0.488 |
| Lb.plantarum_K25GM000659 | Stress-responsive transcriptional regulator             | 0.544 |
| Lb.plantarum_K25GM001290 | MarR family transcriptional regulator                   | 0.478 |
| Lb.plantarum_K25GM000173 | Transcriptional regulator, LacI family                  | 0.422 |
| Lb.plantarum_K25GM001704 | HrcA family transcriptional regulator                   | 0.446 |
| Lb.plantarum_K25GM001704 | HrcA family transcriptional regulator                   | 0.442 |

| Signaling System         |                                                           |       |
|--------------------------|-----------------------------------------------------------|-------|
| Protein-ID               | NCBI Inr Description                                      | Ratio |
| Lb.plantarum_K25GM002758 | Two-component sensor histidine kinase                     | 1.676 |
| Lb.plantarum_K25GM002561 | ABC transporter ATP-binding protein/permease              | 2.012 |
| Lb.plantarum_K25GM001558 | Luciferase                                                | 1.959 |
| Lb.plantarum_K25GM003089 | Signal peptidase I                                        | 1.904 |
| Lb.plantarum_K25GM001458 | Metal ABC transporter substrate-binding protein           | 1.85  |
| Lb.plantarum_K25GM000887 | Cytochrome C2                                             | 1.731 |
| Lb.plantarum_K25GM000346 | ABC transporter ATP-binding protein                       | 1.675 |
| Lb.plantarum_K25GM000345 | Glycine/betaine ABC transporter permease                  | 1.508 |
| Lb.plantarum_K25GM000648 | Preprotein translocase subunit SecA                       | 1.501 |
| Lb.plantarum_K25GM000176 | Sugar ABC transporter substrate-binding protein           | 0.494 |
| Lb.plantarum_K25GM000181 | Multiple sugar-binding transport ATP-binding protein MsmK | 0.446 |
| Lb.plantarum_K25GM002758 | Two-component sensor histidine kinase                     | 1.876 |

| Antioxidant              |                                       |       |
|--------------------------|---------------------------------------|-------|
| Protein-ID               | NCBI Inr Description                  | Ratio |
| Lb.plantarum_K25GM002951 | Thiol reductase thioredoxin           | 2.676 |
| Lb.plantarum_K25GM001301 | 5-formyltetrahydrofolate cyclo-ligase | 2.088 |
| Lb.plantarum_K25GM001979 | Thiol reductase thioredoxin           | 1.842 |
| Lb.plantarum_K25GM003129 | Ferrochelatase                        | 1.776 |
| Lb.plantarum_K25GM001208 | Riboflavin biosynthesis protein RibD  | 0.602 |
| Lb.plantarum_K25GM003057 | Catalase                              | 0.599 |
| Lb.plantarum_K25GM003168 | DNA-binding ferritin-like protein     | 0.48  |
| Lb.plantarum_K25GM001243 | Fe-S cluster assembly protein SufD    | 0.452 |
| Lb.plantarum_K25GM001246 | Fe-S cluster assembly protein SufB    | 0.394 |
| Lb.plantarum_K25GM002951 | Thiol reductase thioredoxin           | 2.676 |
| Lb.plantarum_K25GM001301 | 5-formyltetrahydrofolate cyclo-ligase | 2.088 |
| Lb.plantarum_K25GM001979 | Thiol reductase thioredoxin           | 1.842 |

Table. S2. The representative differential protein species in *L.plantarum* K25 between 10°C and 37°C.
